1 **Title**

2 Application of the fluorescence-activating and absorption-shifting tag (FAST) for flow  
3 cytometry in methanogenic archaea.

4

5 **Running title**

6 FAST fluorescence for cytometry with methanogens.

7

8 **Authors**

9 Norman Adlung<sup>a,b</sup>, [norman.adlung@vtt.fi](mailto:norman.adlung@vtt.fi)

10 Silvan Scheller<sup>a#</sup>, [silvan.scheller@aalto.fi](mailto:silvan.scheller@aalto.fi)

11

12 **Affiliations**

13 <sup>a</sup> School of Chemical Engineering, Department of Bioproducts and Biosystems, Aalto  
14 University, 02150 Espoo, Finland

15 <sup>b</sup> Current address: VTT Technical Research Centre of Finland Ltd., 02044 Espoo, Finland

16

17 **Keywords**

18 Methanogenic archaea, Fluorescence, Flow Cytometry, FAST, *Methanosarcina*

19

20 **Abstract**

21 Methane-producing archaea play a crucial role in the global carbon cycle and are used for  
22 biotechnological fuel production. Methanogenic model organisms such as *Methanococcus*  
23 *maripaludis* and *Methanosarcina acetivorans* are biochemically characterized and can be  
24 genetically engineered using a variety of molecular tools. Methanogens' anaerobic lifestyle

25 and autofluorescence, however, restrict the use of common fluorescent reporter proteins  
26 (e.g., GFP and derivatives) which require oxygen for chromophore maturation. Here, we  
27 employ the tandem activation and absorption-shifting tag protein 2 (tdFAST2) which is  
28 fluorescent when the cell-permeable fluorescent ligand (fluorogen) 4-hydroxy-3,5-  
29 dimethoxybenzylidene rhodanine (HBR-3,5DOM) is present. tdFAST2 expression in *M.*  
30 *acetivorans* and *M. maripaludis* is not cytotoxic and tdFAST2:HBR-3,5DOM fluorescence can  
31 be clearly distinguished from the autofluorescence. In flow cytometry experiments, mixed  
32 methanogen cultures can be clearly distinguished which allows high-throughput  
33 investigations of dynamics within single and mixed cultures.

34

### 35 **Importance**

36 Methane-producing archaea play an essential role in the global carbon cycle and have a high  
37 potential for biotechnological applications such as biofuel production, carbon dioxide  
38 capture, and in electrochemical systems. The oxygen sensitivity and high autofluorescence  
39 hinder the use of common fluorescent proteins to study methanogens. By using the  
40 tdFAST2:HBR-3,5DOM fluorescence, which is functional also under anaerobic conditions and  
41 distinguishable from the autofluorescence, real-time reporter studies and high-throughput  
42 investigation of dynamics within (mixed) cultures via flow cytometry are possible. This will  
43 accelerate the exploitation of the methanogens' biotechnological potential.

44

### 45 **Introduction**

46 Methanogenic archaea are responsible for up to 70% of the methane emitted globally (1).  
47 Besides their relevance for the global carbon cycle, methanogens have a high potential for  
48 biotechnological applications. Applications include (i) production of biogas and biofuel (2),

49 (ii) treatment of solids and sewage water (3), (iii) carbon dioxide capture (4, 5), and (iv)  
50 storage systems for excess electricity via bioelectrochemical systems (6). Genetically  
51 tractable methanogens include *Methanococcus maripaludis* and *Methanosarcina* species.  
52 Genetic tools for methanogens include plasmid-expression systems, genome modification  
53 via homologous recombination and CRISPR/Cas, inducible gene expression, and reporter  
54 systems (7–9).

55 The oxygen sensitivity of methanogens limits the use of common fluorescent proteins.  
56 Fluorescent proteins with a barrel-like structure (e.g. GFP and mCherry) require oxygen for  
57 chromophore maturation and are not fluorescent under anaerobic conditions (10). The use  
58 of fluorescent proteins in methanogens is also hindered by the cells' autofluorescence  
59 (emission maximum at 480 nm), which originates from oxidized coenzyme F420 after  
60 excitation at 420 nm (11). Consequently, valuable tools such as protein localization via  
61 fluorescence microscopy, high-throughput measurement of protein accumulation via flow  
62 cytometry, and fluorescence-activated cell sorting (FACS) are underexplored for  
63 methanogens. In recent years, novel tools to replace oxygen-dependent fluorescent  
64 proteins under anaerobic conditions were developed. These tools employ different  
65 mechanisms, for example (i) flavin mononucleotide-based fluorescent proteins, (ii)  
66 fluorescence activating proteins which require reversible binding of a fluorogenic ligand,  
67 and (iii) self-labelling proteins that require covalent binding to non-fluorogenic ligands (12,  
68 13). Recently, a fluorescence activating protein was successfully applied in the methanogen  
69 *M. maripaludis* (14).

70 Fluorescence-activating proteins such as FAST (*fluorescence-activating and absorption-*  
71 *shifting tag*) and its improved version FAST2 are small, engineered proteins that become  
72 fluorescent upon binding to a fluorogenic ligand (fluorogen) (15, 16). FAST and FAST2 can be

73 N- or C-terminally fused to a protein of interest, expressed as single protein or as a tandem  
74 protein to increase fluorescence (tdFAST/tdFAST2). Different fluorogens were developed;  
75 they are 4-hydroxybenzylidene rhodanine derivatives and determine the  
76 excitation/emission wavelength of the FAST:fluorogen fluorescence upon interaction. FAST  
77 can also be used to study *in vivo* protein-protein interaction where the N- and C-terminal  
78 parts of FAST are fused to the proteins of interest (splitFAST). FAST:fluorogen fluorescence  
79 can be detected when the two proteins of interest interact and bring the N- and C-terminal  
80 FAST parts in close proximity (17). Here, we apply the FAST reporter to the methanogenic  
81 model organism *M. acetivorans* and we demonstrate that the fluorescent reporter provides  
82 reliable results in flow cytometry experiments.

83

## 84 **Results**

### 85 **tdFAST2:HBR-3,5DOM fluorescence in methanogens**

86 Plasmids for constitutive expression of tdFAST2 in *M. acetivorans* (pNB730::tdFAST2) and *M.*  
87 *maripaludis* (pMEV4::tdFAST2) were generated and transformed into methanogens. Cells  
88 transformed with the original (empty) vectors served as control strains. Liquid cultures were  
89 analyzed using a microplate reader under aerobic conditions. A washing step was  
90 introduced to eliminate background fluorescence from the medium. When the fluorogen  
91 HBR-3,5DOM was present, tdFAST2-producing *M. acetivorans* and *M. maripaludis* cells  
92 showed a fluorescence peak around 590 nm when excited at 515 nm (Fig. 1a). This  
93 fluorescence peak was not detected when the fluorogen or tdFAST2 was absent. Thus,  
94 tdFAST2:HBR-3,5DOM fluorescence can be clearly separated from methanogens'  
95 autofluorescence. Further analysis showed that tdFAST2:HBR-3,5DOM fluorescence can be  
96 excited upon a wide range of wavelengths ranging from 480 nm to 550 nm (Fig. 1b). This is

97 in contrast to the fluorogen HMBR, which has a rather narrow excitation range around 490  
98 nm (Supplementary Fig. S1). In further experiments, standard settings of 515 nm for  
99 excitations and 590 nm for emission were used for detection of tdFAST2:HBR-3,5DOM  
100 fluorescence.

101

### 102 **Influence of cell density and fluorogen concentration**

103 We studied the influence of different cell concentrations and fluorogen concentrations on  
104 tdFAST2:HBR-3,5DOM fluorescence in *M. acetivorans*. With an increase in *M. acetivorans*  
105 cell concentration and a constant fluorogen concentration (5  $\mu\text{M}$ ), tdFAST2:HBR-3,5DOM  
106 fluorescence increased linear (Fig. 2a). Autofluorescence and OD(600) measured by the  
107 microplate reader increased similarly to tdFAST2:HBR-3,5DOM fluorescence (Fig. 2a) and,  
108 thus, could be used for normalization of tdFAST2:HBR-3,5DOM fluorescence values when  
109 making comparisons of different cultures.

110 In order to identify the optimal fluorogen concentration, the cell concentration was kept  
111 constant (1 OD unit / ml) while the fluorogen concentration increased from 0.625  $\mu\text{M}$  to 20  
112  $\mu\text{M}$ . tdFAST2:HBR-3,5DOM fluorescence increased rapidly up to a concentration of 2.5  $\mu\text{M}$   
113 before reaching a plateau (Fig. 2b). Notably, higher fluorogen concentrations led to a  
114 decrease of autofluorescence but didn't influence the OD(600) measured by the microplate  
115 reader. Based on these results, a fluorogen concentration of 5  $\mu\text{M}$  was used for further  
116 experiments.

117

### 118 **tdFAST2:HBR-3,5DOM fluorescence during different growth phase**

119 Following protein accumulation over time is an important application for fluorescent  
120 reporter systems. Therefore, we followed tdFAST2:HBR-3,5DOM fluorescence in *M.*

121 *acetivorans* cells in different growth phases. tdFAST2:HBR-3,5DOM fluorescence was highest  
122 during late exponential growth phase while fluorescence was lowest in the stationary phase  
123 (Fig. 3). The *mcrB* promoter controlling tdFAST2 expression is considered a strong and  
124 constitutive promoter (18). Therefore, the differences in tdFAST2:HBR-3,5DOM fluorescence  
125 are more likely due to general, growth phase-dependent fluctuations in protein  
126 accumulation than due to promoter-specific differences. Consequently, when using  
127 tdFAST2:HBR-3,5DOM fluorescence for comparisons between cultures, they should be in  
128 the same growth phase. Remarkably, also autofluorescence was highest in the late  
129 exponential growth phase (Fig. 3) further supporting the hypothesis of growth phase-  
130 dependent differences of *M. acetivorans* cultures.

131

### 132 **Influence of tdFAST2 expression on multiplication**

133 An important feature to consider when utilizing a reporter protein is its potential  
134 harmful/toxic effect on the cell. Therefore, we studied whether tdFAST2 expression has a  
135 general negative influence when expressed in methanogens. As shown in Fig 4, tdFAST2  
136 expression leads only to a minor delay in cell growth and, thus, can be considered as non-  
137 toxic for methanogens.

138

### 139 **Flow cytometry**

140 Detecting a reporter protein's fluorescence via flow cytometry allows the detection of  
141 individual cells' fluorescence and can be considered as gold standard for detection of a  
142 fluorescent reporter. We tested whether flow cytometry can be used to detect  
143 tdFAST2:HBR-3,5DOM fluorescence in methanogens. As shown in Fig. 5, tdFAST2:HBR-  
144 3,5DOM fluorescence was clearly detectable in tdFAST2-expressing *M. acetivorans* cells (Fig.

145 5a) and *M. maripaludis* cells (Fig. 5b) when HBR-3,5DOM was added. Fluorogen  
146 concentrations ranging from 2.5 to 10  $\mu$ M were used and had a minor influence on the  
147 detected tdFAST2:HBR-3,5DOM fluorescence. This is in accordance with measuring the  
148 tdFAST2:HBR-3,5DOM fluorescence using a microplate reader (Fig. 2b). We also detected  
149 methanogens' F420-dependent autofluorescence and found a little increase in fluorescence  
150 when cells showed a high tdFAST2:HBR-3,5DOM fluorescence. Probably, detection of  
151 autofluorescence detects a small amount of tdFAST2:HBR-3,5DOM fluorescence as well (Fig.  
152 5a, b). When no tdFAST2 was expressed, fluorogen addition had no influence on the  
153 fluorescence detected.

154 One application for flow cytometry is to identify distinct populations within mixed cultures.  
155 Thus, we measured *M. acetivorans* and *M. maripaludis* cultures in which tdFAST2-expressing  
156 cells were mixed with cells not harbouring the tdFAST2 gene. Flow cytometry with mixed  
157 cultures clearly identified two tdFAST2:HBR-3,5DOM fluorescence peaks (Fig. 5c and 5d). As  
158 expected, only one peak was detected for autofluorescence. Consequently, flow cytometry  
159 can be used to distinguish and separate tdFAST2-expressing cells from non-tdFAST2  
160 expressing cells based on tdFAST2:HBR-3,5DOM fluorescence.

161

### 162 **Generation of Golden Gate cloning vectors for tdFAST2-tagged proteins.**

163 To simplify the use of tdFAST2 as fluorescence reporter in for *M. acetivorans*, we generated  
164 vectors that allow to generate N- or C-terminal tdFAST2 fusions in a one-step Golden Gate  
165 cloning reaction (19, 20). For this, the plasmid pNB730 was domesticated by removing *Bsa*I  
166 sites in the vector backbone and the tdFAST2-encoding sequence was inserted. Additionally,  
167 a *lacZ* cassette was inserted to allow blue-white selection of clones. The *lacZ* cassette is  
168 flanked by *Bsa*I restriction sites and can be replaced by the protein sequence of interest. For

169 cloning, the sequence of interest can be amplified with primers adding flanking BsaI sites  
170 and the corresponding overhangs (AATG and AAGC) for insertion (forward primer overhang:  
171 5'-TTTGGTCTCTAATG; reverse primer overhang: 5'-TTTGGTCTCTAAGC). If the inserted  
172 sequence is in the same open reading frame as tdFAST2, a AGGGSGGG (C-terminal tdFAST2)  
173 or GGGSGGGM (N-terminal tdFAST2) linker will be encoded between tdFAST2 and the  
174 protein of interest (Fig. 6). The generated plasmids pMaFAST(C) and pMaFAST(N) contain a  
175  $\Phi$ C31 attB sites allowing integration into the *M. acetivorans* genome at attP sites as well as  
176 the *pac* and *bla* genes for selection in *M. acetivorans* and *E. coli*, respectively.

177

## 178 Discussion

179

180 Here, we introduce tdFAST2:HBR-3,5DOM as reliable fluorescent reporter system for the  
181 two methanogenic model organisms *M. acetivorans* and *M. maripaludis*. tdFAST2:HBR-  
182 3,5DOM fluorescence can be measured with a microplate reader as well as by flow  
183 cytometry and shows no overlap with methanogens' autofluorescence, which can be  
184 measured in parallel. Importantly, tdFAST2 expression has no cytotoxic effect. A washing  
185 step was introduced to remove background fluorescence from the medium. This goes along  
186 with recent findings reporting a strong HBR-3,5DOM-dependent background fluorescence in  
187 *M. maripaludis* cultures (14). Similarly, a washing step also reduced background  
188 fluorescence from culture medium when FAST:fluorogen fluorescence was studied in  
189 anaerobic *Clostridium* (21).

190

## 191 A new reporter system for methanogens



192 Previously, the most frequently used reporter in methanogenic archaea was *uidA*. *uidA*  
193 encodes  $\beta$ -glucuronidase which can be quantified by *in vitro* activity assays using cell  
194 extracts from *Methanosarcina* spp. (22, 23) as well as *Methanococcus* spp. (24). Less  
195 commonly used enzymatic reporters in methanogens include acetohydroxyacid synthase,  $\beta$ -  
196 Galactosidase, and  $\beta$ -Lactamase (25, 26). Disadvantages of enzymatic reporters include i)  
197 the need for multiple handling steps hindering high throughput screenings, ii) the inability to  
198 study single cells, and iii) the need of relatively high cell culture volumes. These  
199 disadvantages were partly overcome by using the fluorescent reporter mCherry in *M.*  
200 *maripaludis* (27, 28). Although mCherry can be easily monitored using microplate readers  
201 and shows no overlap with methanogens' autofluorescence, its use is time-consuming and  
202 includes cell lysis by freeze-thawing and overnight exposure to oxygen to allow maturation  
203 of the chromatophore. The latest development of a new reporter system for methanogens  
204 is the quantification of protein accumulation in *M. maripaludis* using FAST1:HMBR  
205 fluorescence (14). There, FAST1 was N-terminally fused to FruA, a hydrogenase subunit,  
206 which is known to be more abundant upon growth in formate-containing medium  
207 compared to hydrogen-containing medium. FAST1-FruA abundance in formate-grown and  
208 hydrogen-grown cells was quantified by anoxic microscopy in which FAST1:HMBR  
209 fluorescence of hundreds of single cells was monitored. Quantification of fluorescence  
210 intensities of several hundred single cells via microscopy is time consuming and impractical  
211 and, unfortunately, it remains unclear why FAST1:HMBR fluorescence in FAST1-FruA  
212 expressing cultures was not quantified using a microplate reader. Based on our experiences,  
213 the use of tdFAST2:HBR-3,5DOM fluorescence in *M. acetivorans* and *M. maripaludis*  
214 outcompetes the above-mentioned reporter systems to study promoter activity/protein

215 accumulation and, by using flow cytometry, even allows the accurate and efficient  
216 quantification of individual cells' fluorescence.

217

### 218 **Aerobic vs. anaerobic detection of FAST:fluorogen fluorescence**

219 Due to technical reasons, we performed fluorescence measurements solely under aerobic  
220 conditions. Notably, also most enzymatic reporter systems are performed aerobically and  
221 the use of mCherry in *M. maripaludis* even includes over-night exposure to oxygen prior to  
222 protein quantification (see above). For quantification of tdFAST2:HBR-3,5DOM fluorescence,  
223 cells were harvested from anaerobic cultures, pelleted, washed, and subsequently analyzed  
224 using a plate reader or by flow cytometry. Handling time before fluorescence measurements  
225 was short (5 – 10 min) and even longer waiting times before addition of 3,5DOM (up to 1 h)  
226 had no influence on the fluorescence (data not shown). We conclude that it is not necessary  
227 to use anaerobic conditions when studying tdFAST2:fluorogen fluorescence in anaerobic  
228 methanogens. The procedure of analyzing FAST:fluorogen fluorescence in anaerobic  
229 organisms under aerobic conditions was used before. For example, FAST:HMBR  
230 fluorescence of anaerobic *Clostridium* organisms was monitored aerobically using confocal  
231 microscopy, microplate reader measurements and flow cytometry measurements (21).  
232 Another recent study applied flow cytometry (aerobic) to detect fluorescence of anaerobic,  
233 acetogenic bacteria (29). Other studies avoid oxygen when detecting FAST:fluorogen  
234 fluorescence of anaerobic organisms, e.g., by placing a fluorescence microscope or  
235 microplate reader into anaerobic chambers (14, 30). To our knowledge, no severe  
236 differences between detection of FAST:fluorogen fluorescence of anaerobic organisms  
237 under anaerobic and aerobic conditions were reported. We hypothesize that, although  
238 oxygen has a severe negative influence on the physiology of strictly anaerobic organisms, its

239 short-term influence on protein abundance, protein localization and protein-protein  
240 interaction remains marginal. This assumption, however, awaits to be systematically  
241 analyzed in future studies.

242

### 243 **Applications of tdFAST2:HBR-3,5DOM fluorescence in methanogens**

244 tdFAST2:HBR-3,5DOM fluorescence allows multiple applications including *in vivo* protein  
245 localization and the analysis of *in vivo* protein-protein interaction when the FAST2 protein is  
246 split and fused to different proteins of interest. Both applications were recently successfully  
247 performed in *M. maripaludis* using a FAST-fluorogen fluorescence (14).

248

249 Flow cytometry allows high-throughput measurement of multiple physical and biochemical  
250 characteristics of cells (31). The ability to detect and sort a large quantity of individual cells  
251 based on tdFAST2:HBR-3,5DOM fluorescence opens new routes to study and engineer  
252 methanogens. For example, differential fluorescence induction (DFI) strategies (32) can be  
253 used to identify inducible promoters for *Methanosarcina* and *Methanococcus* species. For  
254 this, a complex promoter library could be screened by cloning the library in front of a  
255 promoterless tdFAST2 gene and transformation into methanogens. Subsequently, the  
256 transformed culture could be treated with the desired inducer for gene expression and  
257 individual cells would be screened and sorted for high tdFAST2:HBR-3,5DOM fluorescence  
258 using fluorescence-activated cell sorting (FACS). In order to eliminate constitutive  
259 promoters, cells with a high tdFAST2:HBR-3,5DOM fluorescence could be re-grown and  
260 sorted again without the inducer. Obviously, this approach requires to perform cell sorting  
261 under anaerobic conditions to keep methanogens viable; a challenge that was successfully

262 tackled before (33–36). DFI was successfully used in various microbes including *Salmonella*,  
263 *Streptococcus*, *Pseudomonas* and *Bacillus* species (32).

264

265 Another application of flow cytometry experiments using tdFAST2:HBR-3,5DOM  
266 fluorescence in methanogens is the ability to study population dynamics in mixed  
267 methanogen cultures to variations within a culture. Currently, the typical molecular  
268 characterization of *M. acetivorans* and *M. maripaludis* includes genetically modification  
269 (deletion or insertion) and comparing the modified cells to the wildtype. Usually, wildtype  
270 cells and modified cells are separated and characterized individually. Expression of tdFAST2  
271 in either wildtype or modified cells allows studying mixed cultures where tdFAST2:HBR-  
272 3,5DOM fluorescence is used to separate both population. This real-time investigation of  
273 dynamics within mixed cultures allows conclusions about the modification's relevance for  
274 the organism. Measuring population dynamics in mixed culture also gains more relevance in  
275 biotechnology where mixed cultures are increasingly used for production (37). Various  
276 methanogens are known to be involved in direct interspecies electron transfer (DIET) in co-  
277 culture with electron-donating bacteria (38, 39). The ability to separate two methanogen  
278 strains by using tdFAST2:HBR-3,5DOM fluorescence might become a relevant tool to study  
279 DIET co-cultures.

280

## 281 **Material and methods**

### 282 **Strains, cultivation and transformation**

283 The strains *M. acetivorans* WWM73 (18) and *M. maripaludis* S0001 (40) were used.

284 Methanogens were cultivated under strictly anaerobic conditions. For *M. acetivorans*

285 growth, high salt (HS) medium (41) was used containing 125 mM methanol (MeOH) or 50

286 mM trimethylamine (TMA) as the growth substrate. *M. maripaludis* was cultivated using  
287 McFC medium (42). PEG-mediated transformation (43, 44) was used for plasmid integration  
288 into methanogens and 2 µg/ml puromycin was used as selection marker when required.  
289 Plasmids pNB730::tdFAST2 and pNB730 were transformed in *M. acetivorans* and plasmids  
290 pMEV4::tdFAST2 and pMEV4 were transformed in *M. maripaludis*.  
291 For plasmid construction, *Escherichia coli* strain TOP10 (Thermo Fisher Scientific) was used  
292 employing standard methods and enzymes purchased from Thermo Fisher Scientific or New  
293 England BioLabs (NEB).

294

### 295 **Cloning of tdFAST2**

296 The tdFAST2 (also known as td-iFAST (45)) sequence was codon optimized using the Eurofins  
297 GENEius ([www.geneius.de](http://www.geneius.de)) codon-optimization tool and the *M. maripaludis* S2 and *M.*  
298 *acetivorans* C2A codon usage tables taken from <http://www.kazusa.or.jp/codon/>. A  
299 GGGSGGG linker connecting the two FAST2 domains was used and internal restriction sites  
300 (*Bsa*I, *Bbs*I and *Msm*BI) were not allowed. For expression in *M. maripaludis*, a ribosome-  
301 binding site (AGTGGGAGGTGCGC) and the transcriptional terminator from MMP1100  
302 (AAATTCTTCTTCTTTAAACGTTCTCCAGT (46)) was attached to the tdFAST2-coding sequence.  
303 For cloning, sequences were flanked by *Nde*I and *Bam*HI sites or *Spe*I and *Pst*I, respectively.  
304 Sequences were synthesized from Eurofins Scientific and are given in Supplementary file 1.  
305 Classical cloning was used to clone the synthesized fragments into pNB730 (47) for  
306 expression in *M. acetivorans* and pMEV4 (48) for expression in *M. maripaludis*. The  
307 generated plasmids were named pNB730::tdFAST2 and pMEV4::tdFAST2.

308

### 309 **Fluorescence measurements**

310 For microplate reader measurements, a BioTek Cytation 3 Microplate Reader was used.  
311 Cells were harvested from anaerobic cultures and the optical density at 600 nm (OD<sub>600</sub>)  
312 was determined using a spectrophotometer. Cells were pelleted by centrifugation (11000 g,  
313 2 min) and resuspended in a salt solution (400 mM NaCl, 13 mM KCl, 54 mM MgCl<sub>2</sub>, 2 mM  
314 CaCl<sub>2</sub>) mimicking the HS medium. The high salt content serves to prevent cell lysis due to  
315 osmotic changes. Cells were pelleted again and subsequently resuspended in salt solution  
316 containing the fluorogen. If not stated otherwise, a fluorogen concentration of 5 μM and a  
317 volume to obtain a cell density of 1 OD(600) unit/ml was used. 100 μl aliquots were  
318 analysed in Nunc 96-well flat-bottom microplates. Salt solution was used to determine  
319 background fluorescence values which was subtracted from the cells' fluorescence.

320

321 For flow cytometry, a LSRFortessa Cell Analyzer (BD Biosciences) was used. Cells were  
322 harvested from anaerobic cultures, pelleted by centrifugation (11000 g, 2 min), and  
323 resuspended in salt solution. The fluorogen HBR-3,5DOM (45) was added immediately  
324 before flow cytometry analysis. For tdFAST2:HBR-3,5DOM fluorescence, a blue laser (488  
325 nm excitation) and 610/20 nm filter were used. For autofluorescence, a violet laser (405 nm  
326 excitation) and 510/50 nm filter were used, and 20,000 events were recorded. The flow  
327 cytometry analysis was performed at the HiLife Flow Cytometry Unit, University of Helsinki.  
328 Results were analyzed using the FlowJo™ v10.8 Software (BD Biosciences).

329 4-hydroxy-3,5-dimethoxybenzylidene rhodanine (HBR-3,5DOM) and 4-hydroxy-3-  
330 methylbenzylidene rhodanine (HMBR) were purchased from Twinkle Bioscience ([www.the-](http://www.the-twinkle-factory.com)  
331 [twinkle-factory.com](http://www.the-twinkle-factory.com)) and stored as a 5 mM stock solution in DMSO at -20°C.

332

333 **Generation of golden gate cloning vectors**

334 The vector pNB730 was turned into the Golden Gate cloning destination vectors  
335 pMaFAST(C) and pMaFAST(N) using the protocol “Accommodating a vector to Golden Gate  
336 cloning” (19). For this, the *lacZ* cassette was amplified from pUC19 (New England Biolabs,  
337 cat. no. N3041S) using the primers oNA311 (ttgaagacaaAATGtgagaccgcagctggcagcaggtttc)  
338 and oNA312 (ttgaagacaaAAGCtgagaccgtcacagcttgtctgtaagcg). The primer overhangs add *Bpil*  
339 restriction sites (gaagac), 4-nt fusion sites and *Bsal* sites (ggtctc) in reverse complementary  
340 orientation to the *lacZ* fragment. For generation of pMaFAST(C) the vector backbone was  
341 amplified in two parts from pNB730::tdFAST2 to remove one internal *Bsal* site. For this,  
342 primer pairs oNA323 (ttgaagacaaGCTTTAAgGATCCAAGCTTGGGCCCTCG) / oNA304  
343 (ttgaagacaaACGCTCACCGGCTCCAGATTTATC) and oNA305  
344 (ttgaagacaaGCGTGGATCTCGCGGTATCATTG) / oNA328  
345 (ttgaagacaaCATTCCACctCCGCTtCCTCCcCCCACCCGTTTTACAAACACCCAGTAAC) were used.  
346 For generation of pMaFAST(N), the vector backbone was also amplified in two parts from  
347 pNB730::tdFAST2 using the primer pairs oNA343  
348 (ttgaagacaaGCTTCGGGAGGGAGCGGGGGTGGGGAACACGTCGCGTTTGGCTC) / oNA304 and  
349 oNA305 / oNA318 (ttgaagacaaCATTGAATTCCTCCTTAATTTATTAAATCATTTTGGGAC) were  
350 used. Primers have *Bpil* restriction sites with specific 4-nt fusion sites to be compatible to  
351 each other upon ligation. Two backbone fragments and the *lacZ* fragment were fused  
352 together in a Golden Gate cloning reaction with *Bpil*. The cloning product was transformed  
353 into *E. coli* and plated on ampicillin- and X-gal-containing LB plates. Blue colonies were  
354 selected and verified by sequencing the areas around the *Bsal* cloning sites.

355

356 **Acknowledgement**

357 We thank Prof. N. Buan for providing the plasmid pNB730 and Prof. W. Whitman for  
358 providing pMEV4. This work was supported by grants from Novo Nordisk Foundation and  
359 the Academy of Finland (grant NNF19OC0055464 to N.A. and grants NNF19OC0054329 and  
360 326020 to S.S.).

361

## 362 **References**

- 363 1. Conrad R. 2009. The global methane cycle: Recent advances in understanding the  
364 microbial processes involved. *Environ Microbiol Rep* 1:285–292.
- 365 2. Sengupta K, Pal S. 2021. A review on microbial diversity and genetic markers involved in  
366 methanogenic degradation of hydrocarbons: futuristic prospects of biofuel recovery  
367 from contaminated regions. *Environ Sci Pollut Res* 28:40288–40307.
- 368 3. Enzmann F, Mayer F, Rother M, Holtmann D. 2018. Methanogens: biochemical  
369 background and biotechnological applications. *AMB Express* 8:1–22.
- 370 4. Bhatia SK, Bhatia RK, Jeon JM, Kumar G, Yang YH. 2019. Carbon dioxide capture and  
371 bioenergy production using biological system – A review. *Renew Sustain Energy Rev*  
372 110:143–158.
- 373 5. Zabranska J, Pokorna D. 2018. Bioconversion of carbon dioxide to methane using  
374 hydrogen and hydrogenotrophic methanogens. *Biotechnol Adv* 36:707–720.
- 375 6. Zhang S, Jiang J, Wang H, Li F, Hua T, Wang W. 2021. A review of microbial  
376 electrosynthesis applied to carbon dioxide capture and conversion: The basic principles,  
377 electrode materials, and bioproducts. *J CO2 Util* 51:101640.
- 378 7. Leigh JA, Albers SV, Atomi H, Allers T. 2011. Model organisms for genetics in the domain  
379 Archaea: Methanogens, halophiles, *Thermococcales* and *Sulfolobales*. *FEMS Microbiol*  
380 *Rev* 35:577–608.



- 381 8. Nayak DD, Metcalf WW. 2018. Genetic techniques for studies of methyl-coenzyme M  
382 reductase from *Methanosarcina acetivorans* C2A. *Methods Enzymol*, 1st ed. 613:325–  
383 347.
- 384 9. Mondorf S, Deppenmeier U, Welte C. 2012. A novel inducible protein production system  
385 and neomycin resistance as selection marker for *Methanosarcina mazei*. *Archaea*  
386 2012:973743.
- 387 10. Remington SJ. 2006. Fluorescent proteins: maturation, photochemistry and  
388 photophysics. *Curr Opin Struct Biol* 16:714–721.
- 389 11. Eirich LD, Vogels GD, Wolfe RS. 1978. Proposed Structure for Coenzyme F420 from  
390 *Methanobacterium*. *Biochemistry* 17:4583–4593.
- 391 12. Streett H, Charubin K, Papoutsakis ET. 2021. Anaerobic fluorescent reporters for cell  
392 identification, microbial cell biology and high-throughput screening of microbiota and  
393 genomic libraries. *Curr Opin Biotechnol* 71:151–163.
- 394 13. Chia HE, Marsh ENG, Biteen JS. 2019. Extending fluorescence microscopy into anaerobic  
395 environments. *Curr Opin Chem Biol* 51:98–104.
- 396 14. Hernandez E, Costa KC. 2022. The Fluorescence-Activating and Absorption-Shifting Tag  
397 (FAST) Enables Live-Cell Fluorescence Imaging of *Methanococcus maripaludis*. *J Bacteriol*  
398 204:7.
- 399 15. Gautier A, Juillerat A, Heinis C, Corre IR, Kindermann M, Beaufile F, Johnsson K. 2008. An  
400 Engineered Protein Tag for Multiprotein Labeling in Living Cells 15:128–136.
- 401 16. Plamont MA, Billon-Denis E, Maurin S, Gauron C, Pimenta FM, Specht CG, Shi J, Quérard  
402 J, Pan B, Rossignol J, Morellet N, Volovitch M, Lescop E, Chen Y, Triller A, Vriz S, Le Saux  
403 T, Jullien L, Gautier A. 2016. Small fluorescence-activating and absorption-shifting tag for  
404 tunable protein imaging *in vivo*. *Proc Natl Acad Sci U S A* 113:497–502.

- 405 17. Tebo AG, Gautier A. 2019. A split fluorescent reporter with rapid and reversible  
406 complementation. *Nat Commun* 10:1–8.
- 407 18. Guss AM, Rother M, Zhang JK, Kulkarni G, Metcalf WW. 2008. New methods for tightly  
408 regulated gene expression and highly efficient chromosomal integration of cloned genes  
409 for *Methanosarcina* species. *Archaea* 2:193–203.
- 410 19. Marillonnet S, Grütznert R. 2020. Synthetic DNA Assembly Using Golden Gate Cloning and  
411 the Hierarchical Modular Cloning Pipeline. *Curr Protoc Mol Biol* 130:1–33.
- 412 20. Engler C, Kandzia R, Marillonnet S. 2008. A one pot, one step, precision cloning method  
413 with high throughput capability. *PLoS One* 3:E3647.
- 414 21. Streett HE, Kalis KM, Papoutsakis ET. 2019. A Strongly Fluorescing Anaerobic Reporter  
415 and Protein-Tagging System for Clostridium Organisms Based on the Fluorescence-  
416 Activating and Absorption-Shifting Tag Protein (FAST). *Appl Environ Microbiol* 85:1–15.
- 417 22. Pritchett MA, Zhang JK, Metcalf WW. 2004. Development of a Markerless Genetic  
418 Exchange Method for *Methanosarcina acetivorans* C2A and Its Use in Construction of  
419 New Genetic Tools for Methanogenic Archaea. *Appl Environ Microbiol* 70:1425–1433.
- 420 23. Guss AM, Kulkarni G, Metcalf WW. 2009. Differences in hydrogenase Gene expression  
421 between *Methanosarcina acetivorans* and *Methanosarcina barkeri*. *J Bacteriol*  
422 191:2826–2833.
- 423 24. Beneke S, Bestgen H, Klein A. 1995. Use of the *Escherichia coli uidA* gene as a reporter in  
424 *Methanococcus voltae* for the analysis of the regulatory function of the intergenic region  
425 between the operons encoding selenium-free hydrogenases. *Mol Genet Genomics*  
426 248:225–228.
- 427 25. Gardner WL, Whitman WB. 1999. Expression vectors for *Methanococcus maripaludis*:  
428 Overexpression of acetohydroxyacid synthase and  $\beta$ -galactosidase. *Genetics* 152:1439–  
429 1447.

- 430 26. Demolli S, Geist MM, Weigand JE, Matschiavelli N, Suess B, Rother M. 2014.  
431 Development of  $\beta$ -lactamase as a tool for monitoring conditional gene expression by a  
432 tetracycline-riboswitch in *Methanosarcina acetivorans*. *Archaea* 725610:1–10.
- 433 27. Akinyemi TS, Shao N, Lyu Z, Drake IJ, Liu Y, Whitman WB. 2021. Tuning Gene Expression  
434 by Phosphate in the Methanogenic Archaeon *Methanococcus maripaludis*. *ACS Synth*  
435 *Biol* 10:3028–3039.
- 436 28. Lyu Z, Shao N, Chou CW, Shi H, Patel R, Duin EC, Whitman WB. 2020. Posttranslational  
437 methylation of arginine in methyl coenzyme M reductase has a profound impact on both  
438 methanogenesis and growth of *Methanococcus maripaludis*. *J Bacteriol* 202:1–18.
- 439 29. Flaiz M, Baur T, Gaibler J, Kröly C, Dürre P. 2022. Establishment of Green- and Red-  
440 Fluorescent Reporter Proteins Based on the Fluorescence-Activating and Absorption-  
441 Shifting Tag for Use in Acetogenic and Solventogenic Anaerobes. *ACS Synth Biol* 11:953–  
442 967.
- 443 30. Flaiz M, Ludwig G, Bengelsdorf FR, Dürre P. 2021. Production of the biocommodities  
444 butanol and acetone from methanol with fluorescent FAST-tagged proteins using  
445 metabolically engineered strains of *Eubacterium limosum*. *Biotechnol Biofuels* 14:1–20.
- 446 31. Tracy BP, Gaida SM, Papoutsakis ET. 2010. Flow cytometry for bacteria: Enabling  
447 metabolic engineering, synthetic biology and the elucidation of complex phenotypes.  
448 *Curr Opin Biotechnol* 21:85–99.
- 449 32. Rediers H, Rainey PB, Vanderleyden J, De Mot R. 2005. Unraveling the Secret Lives of  
450 Bacteria: Use of *In Vivo* Expression Technology and Differential Fluorescence Induction  
451 Promoter Traps as Tools for Exploring Niche-Specific Gene Expression. *Microbiol Mol Biol*  
452 *Rev* 69:217–261.
- 453 33. Thompson AW, Crow MJ, Wadey B, Arens C, Turkarslan S, Stolyar S, Elliott N, Petersen  
454 TW, van den Engh G, Stahl DA, Baliga NS. 2015. A method to analyze, sort, and retain

- 455 viability of obligate anaerobic microorganisms from complex microbial communities. J  
456 Microbiol Methods 117:74–77.
- 457 34. Qi X, Carberry DM, Cai C, Hu S, Yuan Z, Rubinsztein-Dunlop H, Guo J. 2017. Optical  
458 sorting and cultivation of denitrifying anaerobic methane oxidation archaea. Biomed Opt  
459 Express 8:934.
- 460 35. Bellais S, Nehlich M, Ania M, Duquenoy A, Mazier W, van den Engh G, Baijer J, Treichel  
461 NS, Clavel T, Belotserkovsky I, Thomas V. 2022. Species-targeted sorting and cultivation  
462 of commensal bacteria from the gut microbiome using flow cytometry under anaerobic  
463 conditions. Microbiome 10:1–17.
- 464 36. Hamilton-Brehm SD, Vishnivetskaya TA, Allman SL, Mielenz JR, Elkins JG. 2012. Anaerobic  
465 high-throughput cultivation method for isolation of thermophiles using biomass-derived  
466 substrates. Methods Mol Biol 908:153–168.
- 467 37. Schlembach I, Grünberger A, Rosenbaum MA, Regestein L. 2021. Measurement  
468 Techniques to Resolve and Control Population Dynamics of Mixed-Culture Processes.  
469 Trends Biotechnol 39:1093–1109.
- 470 38. Wang W, Lee DJ. 2021. Direct interspecies electron transfer mechanism in enhanced  
471 methanogenesis: A mini-review. Bioresour Technol 330:124980.
- 472 39. Barua S, Dhar BR. 2017. Advances towards understanding and engineering direct  
473 interspecies electron transfer in anaerobic digestion. Bioresour Technol 244:698–707.
- 474 40. Walters AD, Smith SE, Chong JPJ. 2011. Shuttle vector system for *Methanococcus*  
475 *maripaludis* with improved transformation efficiency. Appl Environ Microbiol 77:2549–  
476 2551.
- 477 41. Sowers KR, Boone JE, Gunsalus RP. 1993. Disaggregation of *Methanosarcina* spp. and  
478 growth as single cells at elevated osmolarity. Appl Environ Microbiol 59:3832–3839.

- 479 42. Long F, Wang L, Lupa B, Whitman WB. 2017. A Flexible System for Cultivation of  
480 *Methanococcus* and Other Formate-Utilizing *Methanogens*. *Archaea* 2017:7046026.
- 481 43. Oelgeschläger E, Rother M. 2009. *In vivo* role of three fused corrinoid/methyl transfer  
482 proteins in *Methanosarcina acetivorans*. *Mol Microbiol* 72:1260–1272.
- 483 44. Tumbula DL, Makula RA, Whitman WB. 1994. Transformation of *Methanococcus*  
484 *maripaludis* and identification of a Pst I-like restriction system. *FEMS Microbiol Lett*  
485 121:309–314.
- 486 45. Tebo A, Pimenta F, Zhang Y, Gautier A, Tebo A, Pimenta F, Zhang Y, Gautier A, Tebo AG,  
487 Pimenta FM, Zhang Y, Gautier A. 2018. Improved chemical-genetic fluorescent markers  
488 for live cell microscopy. *Biochemistry* 57:5648–5653.
- 489 46. Yue L, Li J, Zhang B, Qi L, Li Z, Zhao F, Li L, Zheng X, Dong X. 2020. The conserved  
490 ribonuclease aCPSF1 triggers genome-wide transcription termination of Archaea via a 3'-  
491 end cleavage mode. *Nucleic Acids Res* 48:9589–9605.
- 492 47. Shea MT, Walter ME, Duszenko N, Ducluzeau AL, Aldridge J, King SK, Buan NR. 2016.  
493 PNEB193-derived suicide plasmids for gene deletion and protein expression in the  
494 methane-producing archaeon, *Methanosarcina acetivorans*. *Plasmid* 84–85:27–35.
- 495 48. Lyu Z, Jain R, Smith P, Fetchko T, Yan Y, Whitman WB. 2016. Engineering the Autotroph  
496 *Methanococcus maripaludis* for Geraniol Production. *ACS Synth Biol* 5:577–581.
- 497

498 **Figure legends**

499

500 **Figure 1. tdFAST2-expressing methanogens show a specific fluorescence in the presence of**  
501 **HBR-3,5DOM.**

502 Fluorescence of *M. acetivorans* and *M. maripaludis* cells is shown. **a)** Fluorescence spectrum  
503 upon excitation at 515 nm. **b)** Fluorescence at 590 nm when different excitation  
504 wavelengths are applied. Cells expressing tdFAST2 (tdFAST2) or control cells carrying an  
505 empty vector construct (e.v.) were analysed in presence (w/ fluorogen) or absence (w/o  
506 fluorogen) of HBR-3,5DOM. Cells were in the stationary growth phase. Mean values and  
507 standard deviation of triplicates are shown.

508

509 **Figure 2. Wide ranges of cell concentration and fluorogen concentration can be used to**  
510 **measure tdFAST2:HBR-3,5DOM fluorescence in *M. acetivorans*.**

511 *M. acetivorans* cells expressing tdFAST2 were analysed in the exponential growth phase. A  
512 microplate reader was used to measure OD(600), tdFAST2:HBR-3,5DOM fluorescence ( $\lambda_{\text{Ex}} =$   
513 515 nm /  $\lambda_{\text{Em}} = 590$  nm), and autofluorescence ( $\lambda_{\text{Ex}} = 420$  nm /  $\lambda_{\text{Em}} = 480$  nm). **a)** Correlation  
514 of fluorescence and cell-density when the fluorogen concentration (5  $\mu\text{M}$ ) is constant. **b)**  
515 Influence of the fluorogen concentration on the fluorescence when the cell concentration is  
516 constant (1 OD unit / ml). Note that, due to different light path lengths, the OD(600)  
517 determined by the microplate reader (upper panel) is smaller than the actual cell  
518 concentration (OD units / ml) which was determined using a standard spectrophotometer.  
519 Mean values and standard deviation of duplicates are shown.

520

521 **Figure 3. *M. acetivorans* fluorescence changes at different growth phases.**

522 *M. acetivorans* cells expressing tdFAST2 (+) or harbouring an empty vector construct (-)  
523 were analysed at exponential (Exp; OD(600) 0.3 – 0.6), late exponential (Late Exp; 0.8 – 1.1),  
524 and stationary growth (Stat; >1.1). tdFAST2:HBR-3,5DOM fluorescence ( $\lambda_{\text{Ex}} = 515 \text{ nm} / \lambda_{\text{Em}} =$   
525 590 nm), and autofluorescence ( $\lambda_{\text{Ex}} = 420 \text{ nm} / \lambda_{\text{Em}} = 480 \text{ nm}$ ) is shown. Mean values and  
526 standard deviation of duplicates are shown.

527

528 **Figure 4. tdFAST2 is not toxic for methanogens.**

529 Growth of *M. acetivorans* and *M. maripaludis* expressing either tdFAST2 or harbouring an  
530 empty vector construct (e.v.) was analysed. Mean values and standard deviation of  
531 triplicates are shown.

532

533 **Figure 5. Flow cytometry allows visualization of tdFAST2 expression and separation of**  
534 **populations.**

535 Histograms of *M. acetivorans* (a) and *M. maripaludis* (b) cells expressing tdFAST2 (tdFAST2)  
536 or control cells carrying an empty vector construct (e.v.) in presence of increasing fluorogen  
537 (HBR-3,5DOM) concentrations. (c and d) Mixtures of tdFAST2-expressing cells and non  
538 tdFAST2-expressing cells were analyzed in the presence of 5 mM HBR-3,5DOM.

539

540 **Figure 6. Golden Gate cloning vectors to study tdFAST2-tagged proteins.**

541 The plasmids pMaFAST(C) and pMaFAST(N) encode the tdFAST2 gene which is codon-  
542 optimized for expression in *Methanosarcina*. Golden Gate cloning (*Bsa*I) can be used to  
543 replace the *lacZ* cassette with a protein-encoding sequence of interest leading to a C- or N-  
544 terminal fusion to the tdFAST2. Nucleotide sequence of the cloning sites are shown below.

545 The *Bsa*I sites, ribosome-binding site (rbs) and the tdFAST2 open-reading frame is given.

546

547 **Supplementary Figure 1. tdFAST2-expressing methanogens show a specific fluorescent**  
548 **when the fluorogen HMBR is present.**

549 Fluorescence of *M. acetivorans* and *M. maripaludis* cells is shown. **a)** Fluorescence spectrum  
550 upon excitation at 480 nm. **b)** Fluorescence at 540 nm when different excitation  
551 wavelengths are applied. Cells expressing tdFAST2 (tdFAST2) or control cells carrying an  
552 empty vector construct (e.v.) were analysed in presence (w/ fluorogen) or absence (w/o  
553 fluorogen) of HMBR. Used cells were in the stationary growth phase. Mean values and  
554 standard deviation of duplicates are shown.

555



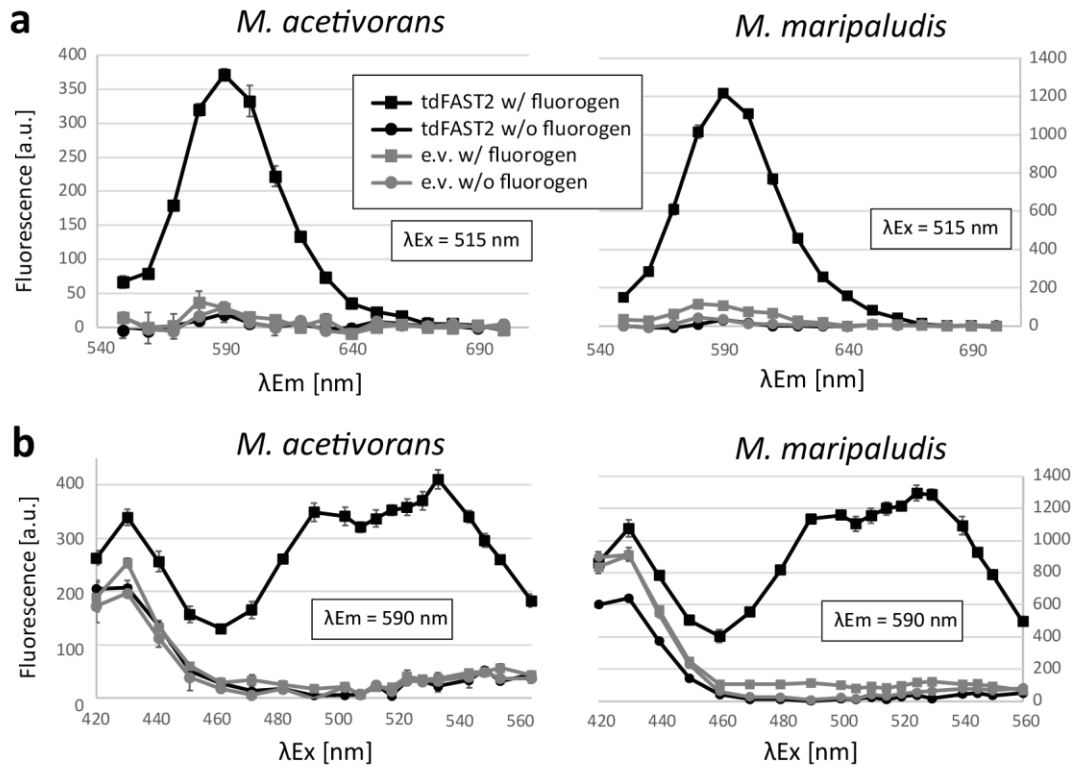

**Figure 1. tdFAST2-expressing methanogens show a specific fluorescence in the presence of HBR-3,5DOM.**

Fluorescence of *M. acetivorans* and *M. maripaludis* cells is shown. **a)** Fluorescence spectrum upon excitation at 515 nm. **b)** Fluorescence at 590 nm when different excitation wavelengths are applied. Cells expressing tdFAST2 (tdFAST2) or control cells carrying an empty vector construct (e.v.) were analysed in presence (w/ fluorogen) or absence (w/o fluorogen) of HBR-3,5DOM. Cells were in the stationary growth phase. Mean values and standard deviation of triplicates are shown.

556

557

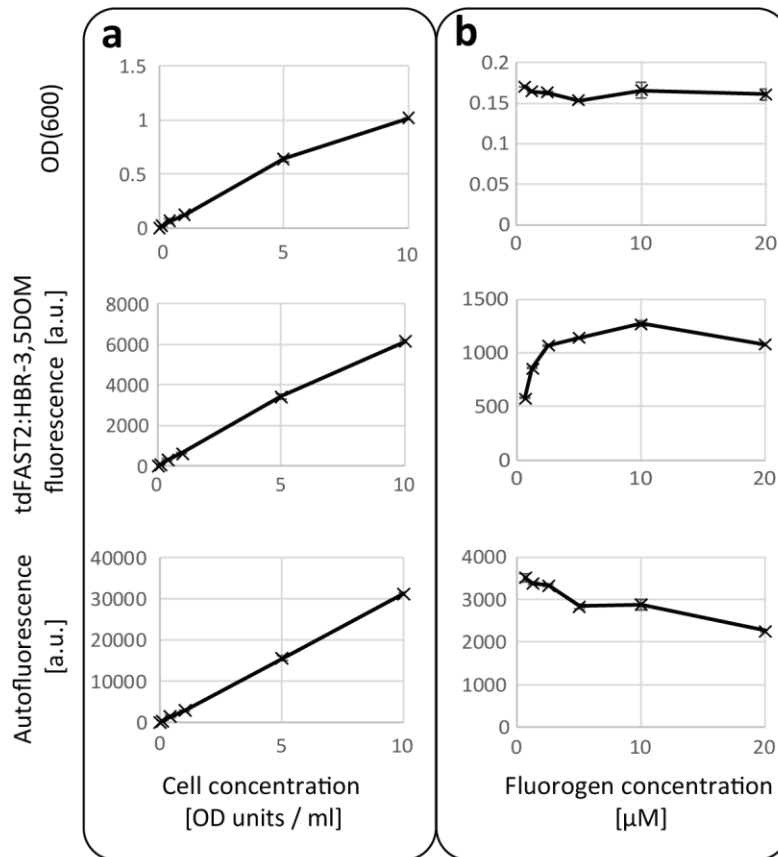

**Figure 2. Wide ranges of cell concentration and fluorogen concentration can be used to measure tdFAST2:HBR-3,5DOM fluorescence in *M. acetivorans*.**

*M. acetivorans* cells expressing tdFAST2 were analysed in the exponential growth phase. A microplate reader was used to measure OD(600), tdFAST2:HBR-3,5DOM fluorescence ( $\lambda_{\text{Ex}} = 515 \text{ nm} / \lambda_{\text{Em}} = 590 \text{ nm}$ ), and autofluorescence ( $\lambda_{\text{Ex}} = 420 \text{ nm} / \lambda_{\text{Em}} = 480 \text{ nm}$ ). **a)** Correlation of fluorescence and cell-density when the fluorogen concentration (5  $\mu\text{M}$ ) is constant. **b)** Influence of the fluorogen concentration on the fluorescence when the cell concentration is constant (1 OD unit / ml). Note that, due to different light path lengths, the OD(600) determined by the microplate reader (upper panel) is smaller than the actual cell concentration (OD units / ml) which was determined using a standard spectrophotometer. Mean values and standard deviation of duplicates are shown.

558

559

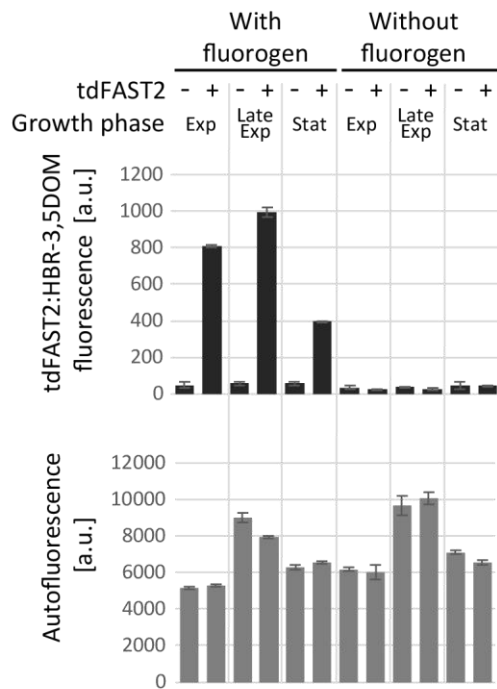

**Figure 3. *M. acetivorans* fluorescence changes at different growth phases.**

*M. acetivorans* cells expressing tdFAST2 (+) or harbouring an empty vector construct (-) were analysed at exponential (Exp; OD(600) 0.3 – 0.6), late exponential (Late Exp; 0.8 – 1.1), and stationary growth (Stat; >1.1). tdFAST2:HBR-3,5DOM fluorescence ( $\lambda_{Ex} = 515 \text{ nm} / \lambda_{Em} = 590 \text{ nm}$ ), and autofluorescence ( $\lambda_{Ex} = 420 \text{ nm} / \lambda_{Em} = 480 \text{ nm}$ ) is shown. Mean values and standard deviation of duplicates are shown.

560

561

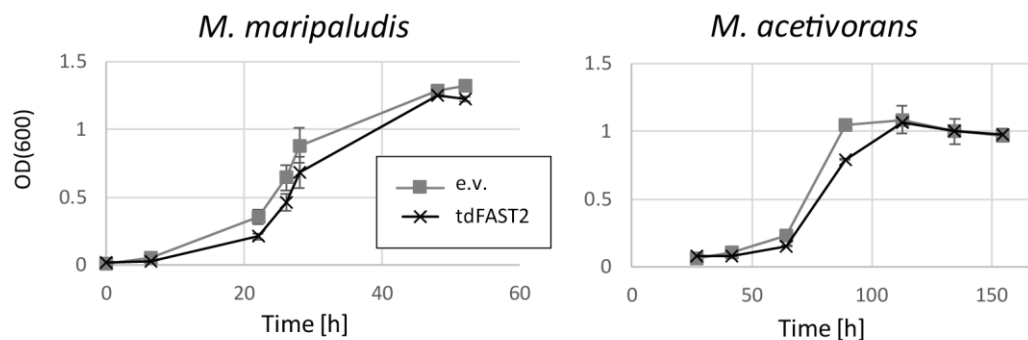

**Figure 4. tdFAST2 is not toxic for methanogens.**

Growth of *M. acetivorans* and *M. maripaludis* expressing either tdFAST2 or harbouring an empty vector construct (e.v.) was analysed. Mean values and standard deviation of triplicates are shown.

562

563

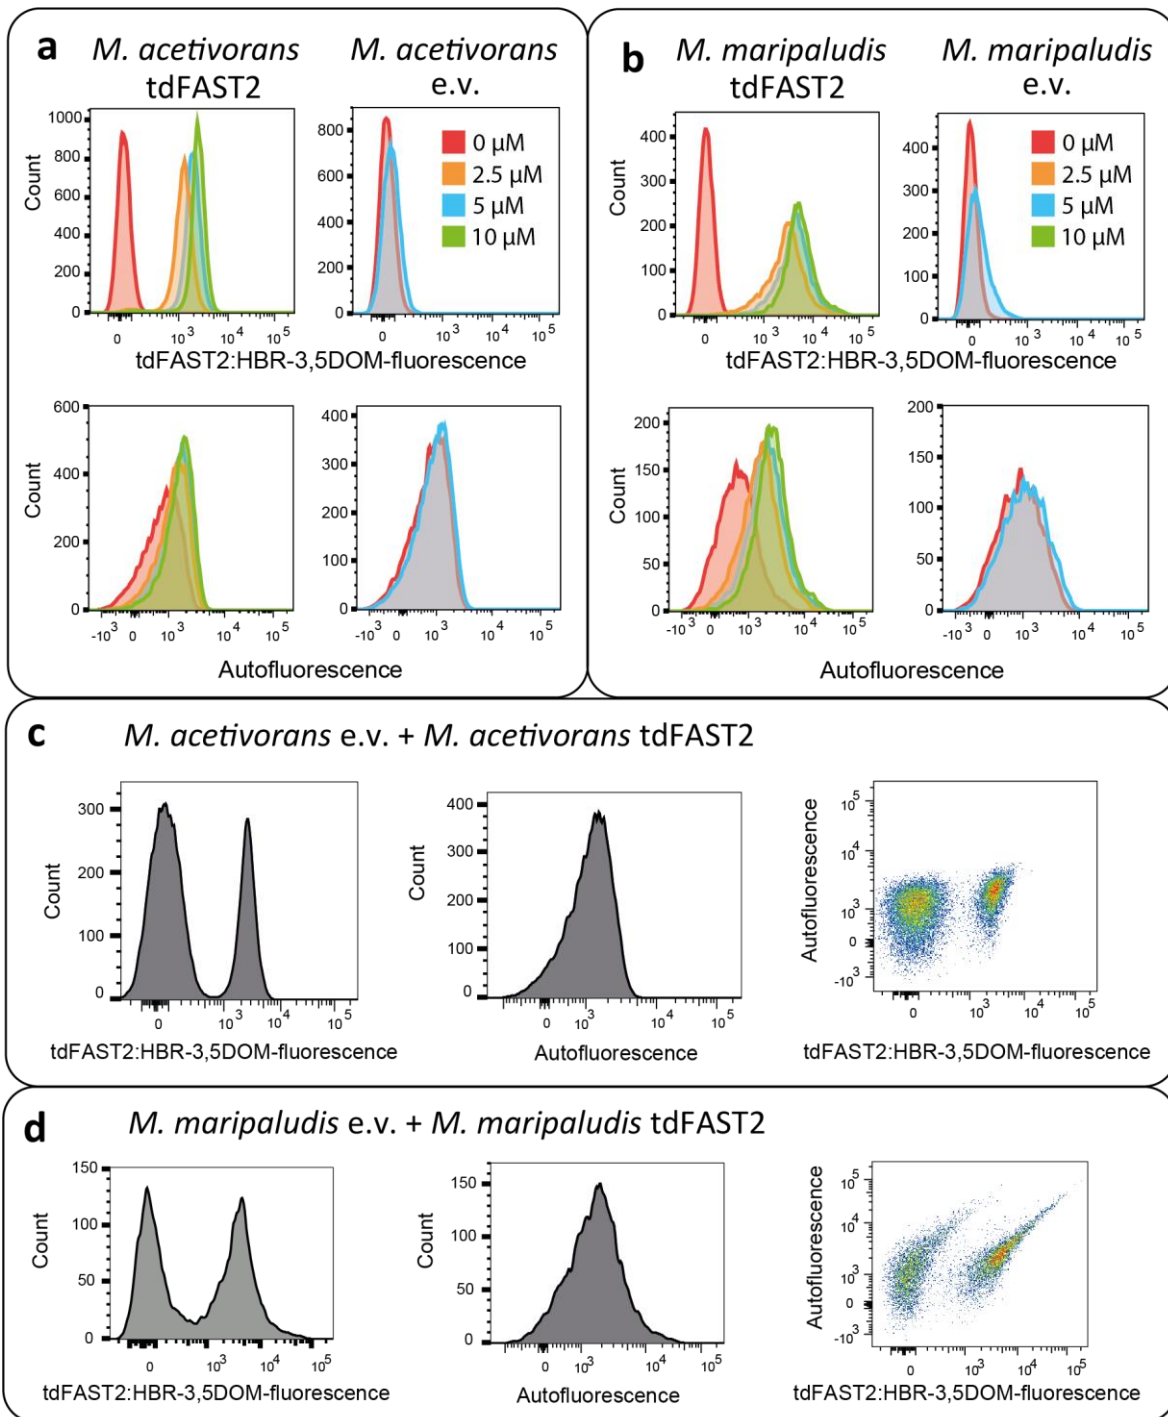

**Figure 5. Flow cytometry allows visualization of tdFAST2 expression and separation of populations.** Histograms of *M. acetivorans* (a) and *M. maripaludis* (b) cells expressing tdFAST2 (tdFAST2) or control cells carrying an empty vector construct (e.v.) in presence of increasing fluorogen (HBR-3,5DOM) concentrations. (c and d) Mixtures of tdFAST2-expressing cells and non tdFAST2-expressing cells were analyzed in the presence of 5 mM HBR-3,5DOM.

564

565

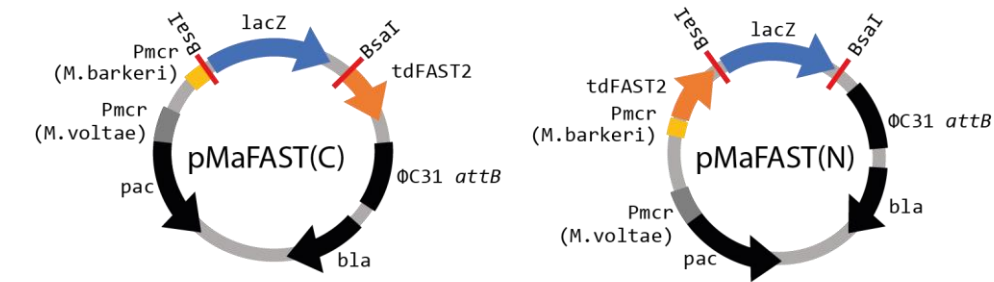

### pMaFAST(C)

<sup>rbs</sup>  
 TAATAAATTAAGGAGGAAATTCAAATGTGAGACCgcagc...lacZ...gtgacGGTCTCAGCTTCGGGAGGAGGGAGCGGGGTGGGGAACATGTTGCT...  
 ATTATTTAATTCCTCCTTTAAGTTTACACTCTGGcgctcg...lacZ...cactgCCAGAGTCGAAAGCCCTCCTCCTCGCCCCACCCCTTGACAACGA...  
<sup>IesB</sup>

### pMaFAST(N)

<sup>R V G G G S G G G M</sup>  
 CGGGTGGGGGAGGAAGCGGAGGTGGAATGTGAGACCgcagc...lacZ...gtgacGGTCTCAGCTTTAAGGATCCAAGC  
 GCCCACCCCTCCTTCGCCTCCACCTTACACTCTGGcgctcg...lacZ...cactgCCAGAGTCGAAAGCCCTCCTCCTCGCCCCACCCCTTGACAACGA...  
<sup>IesB</sup>

**Figure 6. Golden Gate cloning vectors to study tdFAST2-tagged proteins.**

The plasmids pMaFAST(C) and pMaFAST(N) encode the tdFAST2 gene which is codon-optimized for expression in *Methanosarcina*. Golden Gate cloning (BsaI) can be used to replace the lacZ cassette with a protein-encoding sequence of interest leading to a C- or N-terminal fusion to the tdFAST2. Nucleotide sequence of the cloning sites are shown below. The BsaI sites, ribosome-binding site (rbs) and the tdFAST2 open-reading frame is given.

566

567

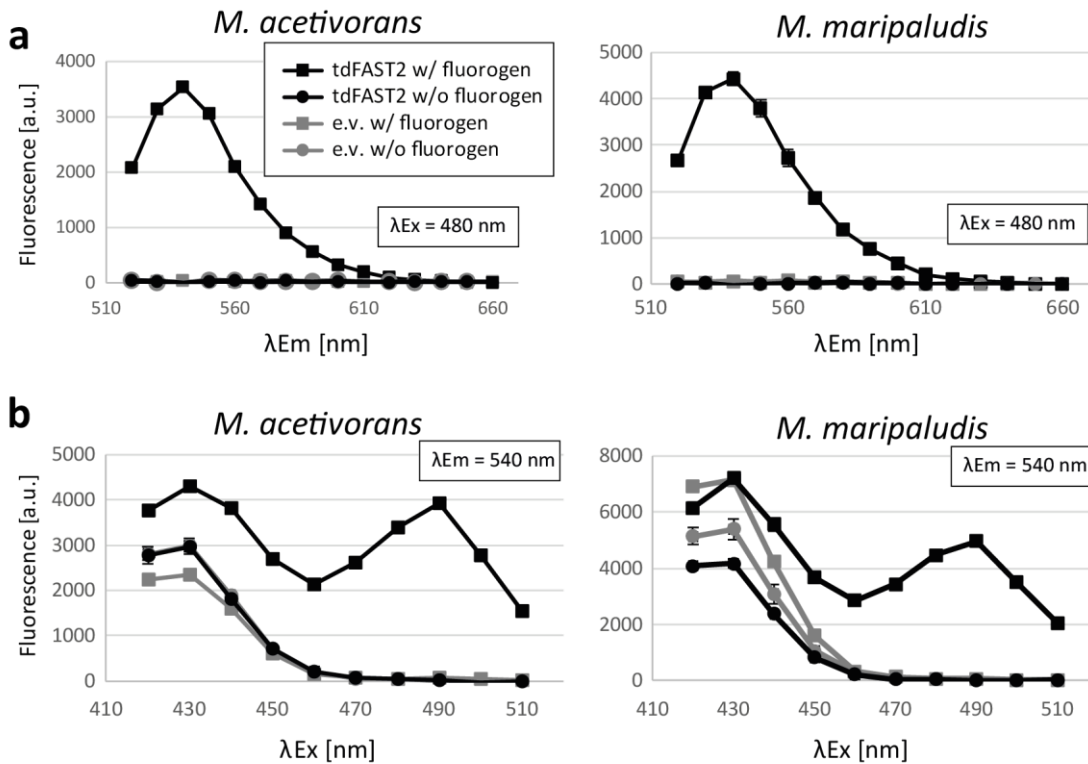

**Supplementary Figure 1. tdFAST2-expressing methanogens show a specific fluorescent when the fluorogen HMBR is present.**

Fluorescence of *M. acetivorans* and *M. maripaludis* cells is shown. **a**) Fluorescence spectrum upon excitation at 480 nm. **b**) Fluorescence at 540 nm when different excitation wavelengths are applied. Cells expressing tdFAST2 (tdFAST2) or control cells carrying an empty vector construct (e.v.) were analysed in presence (w/ fluorogen) or absence (w/o fluorogen) of HMBR. Used cells were in the stationary growth phase. Mean values and standard deviation of duplicates are shown.

568

569

570 **Appendix**

571 Supplementary File 1

572 **Synthesized sequences**

573

574 Synthesized fragment encoding codon-optimized tdFAST2 for expression in *M. acetivorans*

575 CATATGGAACACGTCGCGTTTGGCTCGGAAGATATTGAGAACACGTTAGCTAAAATGGAT  
 576 GATGGTCAACTAGACGGCTTAGCCTTCGGTGCAATACAGCTGGACGGAGATGGCAATATC  
 577 TTGCAGTATAATGCCGCGGAGGGCGACATAACCGGACGAGATCCTAAACAGGTCATTGGA  
 578 AAGAACTTCTTCAAGGATGTAGCCCCAGGCACCGATTCCCCTGAATTTTACGGAAAGTTC  
 579 AAAGAAGGAGTTGCAAGTGGGAACCTGAATACGATGTTTGAATGGATGATTCGGACCTCA  
 580 AGAGGTCCTACCAAAGTTAAGATACACATGAAAAAGGCCCTTCCGGAGATTCTTATTGG  
 581 GTATTCGTTAAGAGGGTTGGAGGAGGGAGCGGGGGTGGGAACATGTTGCTTTTGGAAAGC  
 582 GAAGATATCGAAAACACCCTTGCAAAAATGGATGATGGACAACCTCGATGGTCTGGCTTTT  
 583 GGCGCTATCCAGCTGGATGGGGACGGGAATATACTCCAGTACAATGCTGCAGAAGGAGAC  
 584 ATTACAGGAAGGGACCCAAAGCAGGTAATCGGCAAAACCTTCTTCAAAGACGTTGCACCA  
 585 GGAACGGACTCGCCAGAATTCTATGGGAAGTTTAAAGAAGGGGTTCGCTTCCGGTAACCTT  
 586 AACACTATGTTTGGAGTGGATGATTCACCGTCTAGAGGTCCCACTAAAGTGAAAATACAC  
 587 ATGAAAAAAGCACTTAGTGGAGACAGTTACTGGGTGTTTGTAAAACGGGTGTAAGGATCC

588 underlined = tdFAST2 protein-encoding sequence

589 **CATATG** = *NdeI* restriction site

590 **GGATCC** = *Bam*HI site

591

592 Synthesized fragment encoding codon-optimized tdFAST2 for expression in *M. maripaludis*

593 **ACTAGT**AGTGGGAGGTGCGCTATGGAACATGTGGCCTTCGGATCAGAAGATATAGAGAAC  
594 ACTTTAGCCAAGATGGATGATGGGCAATTAGACGGATTAGCGTTTGGGGCAATTCAGCTA  
595 GATGGGGATGGTAACATTCTTCAATACAATGCTGCTGAAGGGGATATAACCGGGCGAGAT  
596 CCAAAACAGGTAATTGGAAAGAATTTTTTCAAAGACGTCGCACCGGGTACAGATTCACCT  
597 GAATTTTATGGTAAATTTAAAGAAGGTGTTGCAAGTGGAAATCTCAATACGATGTTCGAA  
598 TGGATGATACCTACATCTAGAGGACCTACGAAAGTAAAAATCCACATGAAAAAGCTCTA  
599 TCAGGTGACAGCTATTGGGTATTTGTTAAAAAGAGTAGGAGGCGGGTCAGGAGGAGGAGAA  
600 CACGTCGCTTTCGGTAGTGAAGATATAGAAAACACATTAGCAAAGATGGACGACGGACAG  
601 CTTGATGGGCTTGCATTTGGAGCAATCCAATTAGATGGAGATGGTAATATACTTCAATAC  
602 AATGCAGCAGAAGGTGACATCACTGGTAGAGATCCCAAACAGGTCATTGGAAAAAATTTT  
603 TTTAAAGATGTTGCACCAGGAACAGATTCCCCAGAATTTTACGGAAAATTTAAAGAAGGA  
604 GTAGCATCTGGAAATTTGAATACAATGTTTGAATGGATGATTCCAACCTCTAGAGGACCA  
605 ACTAAAGTTAAGATTCACATGAAAAAGCACTGTCGGGAGATTTCATATTGGGTTTTTGT  
606 AAAAGGGTTTAA**AAATTCCTTCTCTTTTAAACGTTCTCCAGTCTGCAG**

607

608            = tdFAST2 protein-encoding sequence

609 **bold** = terminator sequence

610 **ACTAGT** = *SpeI* restriction site

611 **CTGCAG** = *PstI* site

612

613

614 Supplementary File 2

615 **Plasmid sequences**

616

617 **pNB730::tdFAST2**

618 TCTAGTTGTCTGCTCCCGGCATCCGCTTACAGACAAGCTGTGACCGTCTCCGGGAGCTGCATGTGTC  
619 AGAGGTTTTACCCTCATCACCGAAACGCGGAGACGAAAGGGCCTCGTGATACGCCTATTTTTATA  
620 GGTTAATGTCATGATAATAATGGTTTCTTAGACGTCAGGTGGCACTTTTCGGGAAATGTGCGCGGA  
621 ACCCTATTTGTTATTTTTCTAAATACATTCAAATATGTATCCGCTCATGAGACAATAACCCTGATAA  
622 ATGCTTCAATAATATTGAAAAAGGAAGAGTATGAGTATTCAACATTTCCGTGTCGCCCTTATCCCTT  
623 TTTTGCGGCATTTCCTTCTGTTTTGCTCACCCAGAAACGCTGGTGAAGTAAAGATGCTGAAG  
624 ATCAGTTGGGTGCACGAGTGGTTACATCGAACTGGATCTCAACAGCGGTAAGATCCTTGAGAGTT  
625 TTCGCCCCGAAGAACGTTTTCCAATGATGAGCACTTTTAAAGTTCTGCTATGTGGCGCGGTATTATCC  
626 CGTATTGACGCCGGGCAAGAGCAACTCGGTGCGCCGATACACTATTCTCAGAATGACTTGTTGAGT  
627 ACTCACCAGTCACAGAAAAGCATCTTACGGATGGCATGACAGTAAGAGAATTATGCAGTGCTGCCAT  
628 AACCATGAGTGATAACACTGCGGCCAACTTACTTCTGACAACGATCGGAGGACCGAAGGAGCTAAC  
629 CGCTTTTTTGCACAACATGGGGGATCATGTAACCTCGCCTTGATCGTTGGGAACCGGAGCTGAATGAA  
630 GCCATACCAAACGACGAGCGTGACACCACGATGCCTGTAGCAATGGCAACAACGTTGCGCAAATA  
631 TTAAGTGGCGAACTACTTACTCTAGCTTCCCGGCAACAATTAATAGACTGGATGGAGGCGGATAAAG  
632 TTGCAGGACCACTTCTGCGCTCGGCCCTCCGGCTGGCTGTTTATTGCTGATAAATCTGGAGCCGG  
633 TGAGCGTGGGTCTCGCGGTATCATTGCAGCACTGGGGCCAGATGGTAAGCCCTCCCGTATCGTAGTT  
634 ATCTACACGACGGGGAGTCAGGCAACTATGGATGAACGAAATAGACAGATCGCTGAGATAGGTGC  
635 CTCACTGATTAAGCATTGGTAACTGTCAGACCAAGTTTACTCATATATACTTTAGATTGATTTAAACT  
636 TCATTTTTAATTTAAAGGATCTAGGTGAAGATCCTTTTTGATAATCTCATGACCAAATCCCTAACG  
637 TGAGTTTTCGTTCCACTGAGCGTCAGACCCCGTAGAAAAGATCAAAGGATCTTCTGAGATCCTTTTT



638 TTCTGCGCGTAATCTGCTGCTTGCAAACAAAAAACCACCGCTACCAGCGGTGGTTTGTGGCCGGA  
639 TCAAGAGCTACCAACTCTTTTTCCGAAGGTAAGTGGCTTCAGCAGAGCGCAGATACCAAATACTGTT  
640 CTTCTAGTGTAGCCGTAGTTAGGCCACCACTTCAAGAACTCTGTAGCACCGCCTACATACCTCGCTCT  
641 GCTAATCCTGTTACCAGTGGCTGCTGCCAGTGGCGATAAGTCGTGTCTTACCGGGTTGGACTCAAGA  
642 CGATAGTTACCGGATAAGGCGCAGCGGTGGGCTGAACGGGGGGTTCGTGCACACAGCCCAGCTT  
643 GGAGCGAACGACCTACACCGAACTGAGATACCTACAGCGTGAGCTATGAGAAAGCGCCACGCTTCC  
644 CGAAGGGAGAAAGGCGGACAGGTATCCGGTAAGCGGCAGGGTCGGAACAGGAGAGCGCACAGAG  
645 GGAGCTTCCAGGGGAAACGCCTGGTATCTTTATAGTCCTGTGCGGGTTTCGCCACCTCTGACTTGAG  
646 CGTCGATTTTTGTGATGCTCGTCAGGGGGCGGAGCCTATGGAAAACGCCAGCAACGCGGCCTTT  
647 TTACGGTTCCTGGCCTTTTGTGCTGGCCTTTTGTGCTCACATGTTCTTTCCTGCGTTATCCCCTGATTCTGTG  
648 GATAACCGTATTACCGCCTTTGAGTGAGCTGATACCGCTCGCCGAGCCGAACGACCGAGCGCAGC  
649 GAGTCAGTGAGCGAGGAAGCGGAAGAGCGCCAATACGCAAACCGCCTCTCCCCGCGCGTTGGCC  
650 GATTCATTAATGCAGCTGGCACGACAGGTTTCCCGACTGGAAAGCGGGCAGTGAGCGCAACGCAAT  
651 TAATGTGAGTTAGCTCACTCATTAGGCACCCAGGCTTTACACTTTATGCTTCCGGCTCGTATGTTGT  
652 GTGGAATTGTGAGCGGATAACAATTTACACAGGAAACAGCTATGACCATGATTACGCCAAGCTTGC  
653 ATGCTCATGCTCCAGGTTTCTGTCTTCGGGCACCTCGACGTCGGCGGTGACGGTGAAGCCGAGCC  
654 GCTCGTAGAAGGGGAGGTTGCGGGGCGCGGAGGTCTCCAGGAAGGCGGGCACCCCGGCGCGCTC  
655 GGCCGCTCCACTCCGGGGAGCACGACGGCGCTGCCAGACCTTGCCCTGGTGGTGGGCGGAGAC  
656 GCCGACGGTGGCCAGGAACCACGCGGGCTCCTTGGGCCGGTGGCGGCCAGGAGGCCTTCCATCT  
657 GTTGCTGCGCGGCCAGCCGGGAACCGCTCAACTCGGCCATGCGCGGGCCGATCTCGGCGAACACCG  
658 CCCCCGCTTCGACGCTCTCCGGCGTGGTCCAGACCGCCACCGCGGCGCCGTCGTCCGCGACCCACAC  
659 CTTGCCGATGTCGAGCCCCAGCGCGTGAGGAAGAGTTCTTGCACTCGGTGACCCGCTCGATGTG  
660 GCGGTCCGGTTCGACGGTGTGGCGGTGGCGGGGTAGTCGGCGAACGCGGCGGCGAGGGTGCCT  
661 ACGGCCCGGGGACGTCGTCGCGGGTGGCGAGGCGCACCGTGGGTTTATATTCGGTTCATGAGAAT  
662 CACTCTAGTTCCTATTTTTTTGATATATACATCATAACATTACTCTATGTATATATATTCCTTTTTTATT  
663 AACATTAATAGAAAAGTTTATATATAAGATGTTAATAACACAATAATTTGAATTTGAATACTCAAAA  
664 AATGGGCTTTAATATATAAAAATTAAGATGAAAATAGATGATTTTTTAAAAAATGTTATTATTATATC  
665 TCAATATCTAAATATTAGATTAATATTAATTATTACCCAAATATTTCAATGAATATTTAGTTTTGAATA  
666 GTATATTACGAATAGGGCGTTTTTTTATTACCTACTACTATTTTCCGAAGATTTTTTAAAGACTCTCTTAA  
667 AATTAATCATCCTCTAGAGGCGCGCAATACGCAAACCGACTAGACTTAATTAAGATCCGGCGCGCC  
668 CCCGGGTACCGAGCTCGAATCACTGGCCGTCGTTTTACAACGTCGTGACTGGGAAAACCTGGCGT  
669 TACCCAACCTAATCGCCTTGCAGCACATCCCCCTTTCGCCAGCTGGCGTAATAGCGAAGAGGCCCGC  
670 ACCGATCGCCCTTCCCAACAGTTGCGCAGCCTGAATGGCGAATGGCGCCTGATGCGGTATTTTCTCC  
671 TTACGCATCTGTGCGGTATTTTACACCTCATTATCGGAGAACACAAAAGATTTAAGTACCTTCTAAA  
672 CGAATGAGATTTTATTGGGAATAGTGGACACTCGAGTAGGTGACCAGTCCCAAAATGATTTTAATAA  
673 ATTAAGGAGGAAATTCATATGGAACACGTCGCGTTTTGGCTCGGAAGATATTGAGAACACGTTAGCT  
674 AAAATGGATGATGGTCAACTAGACGGCTTAGCCTTCGGTGAATACAGCTGGACGGAGATGGCAAT  
675 ATCTTGCAGTATAATGCCGCGGAGGGGCGACATAACCGGACGAGATCCTAAACAGGTCATTGGAAAG  
676 AACTTCTCAAGGATGTAGCCCCAGGCACCGATTCCCCTGAATTTTACGGAAAGTTCAAAGAAGGAG  
677 TTGCAAGTGGGAACCTGAATACGATGTTTGAATGGATGATTCCGACCTCAAGAGGTCCTACCAAAGT  
678 TAAGATACACATGAAAAAGGCCCTTTCCGGAGATTCTTATTGGGTATTGTTAAGAGGGTTGGAGG  
679 AGGGAGCGGGGGTGGGGAACATGTTGCTTTTGAAGCGAAGATATCGAAAACACCCTTGCAAAAA  
680 TGGATGATGGACAACCTCGATGGTCTGGCTTTTGGCGCTATCCAGCTGGATGGGGACGGGAATATAC  
681 TCCAGTACAATGCTGCAGAAGGAGACATTACAGGAAGGGACCCAAAGCAGGTAATCGGCAAAAAC  
682 TTCTTCAAAGACGTTGCACCAGGAACGGACTCGCCAGAATTCTATGGGAAGTTTAAAGAAGGGGTC  
683 GCTTCCGGTAACCTTAACACTATGTTTGTGAGTGGATGATTCCCACGTCTAGAGGTCCCACTAAAGTGA  
684 AAATACACATGAAAAAGCACTTAGTGGAGACAGTTACTGGGTGTTTGTAAAACGGGTGTAAgGAT



685 CCAAGCTTGGGCCCTCGCGACTCGAGACACCACCATCATCATCACCACCATTGGTCCCATCCCCAATT  
686 TGAAAAGTAGTTAATGACGCGCCCTGACGGGACTAGAATGAATCAACAACCTCTCTGGCGCACCATC  
687 GTCGGCTACAGCCTCGGTGACGTCGCCAATAACTTCGCCTTCGCAATGGGGGCGCTCTTCTGTTGA  
688 GTTACTACACCGACGTCGCTGGCGTGGTGGCCGCTGCGGGCGGGCACCATGCTGTTACTGGTGCGGG  
689 TATTCGATGCCTTCGCCGACGCTTTGCCGACGAGTGGTGGACAGTGTGAATATCCGCTGGGGAA  
690 AATTCGCCCGTTTTACTCTTCGGTACTGCGCCGTTAATGATCAGATCCGAGCTCAAGCTTCTTGAT  
691 AACTTCGTATAATGTATGCTATACGAAGTTATCCCTTAGTGAGGGTTAATTAAGCGGCCGCCGGG  
692 CCGGCCATTTAAATGCATGCGACTTCCGAAAAACAGCAAAGAAAAGCCAGTATGGAAAAATAGA  
693 CAAAAAGTAGGCTAAAAGGCCTACTCTGTTTTAACTGTTGAATTTATTGAGTTCGAGTGAGGTGGA  
694 GTACGCGCCCGGGGAGCCCAAGGGCAGCCCTGGCACCCGCACCGCGGATCGATCGAATTCTCGAC  
695 CAATTCTCATGTTTGACAGCTTATCATCGAATTTCTGCCATTCATCCGCTTATTATCACTTATTCAGGC  
696 GTAGCAACCAGGCGTTAAGGGCACCAATAACTGCCTTAAAAAATTACGCCCCGCCCTGCCACTCA  
697 TCGCAGTACTGTTGTAATTCATTAAGCATTCTGCCGACATGGAAGCCATCACAAACGGCATGATGAA  
698 CCTGAATCGCCAGCG

699

700 **pMEV4::tdFAST2**

701 cgatgcctgtagcaatggcaacaacggtgcgcaaacctattaactggcgaactacttactctagcttcccggcaacaattaatagact  
702 ggatggaggcggataaagttgcaggaccacttctgcgctcggcccttccggctggctggtttattgctgataaatctggagccggtg  
703 agcgtgggtctcgcggtatcattgcagcactggggccagatggttaagccctcccgtatcgtagtattctacacgacggggagtcagg  
704 caactatggatgaacgaaatagacagatcgtgagataggtgcctcactgattaagcattggttaactgtcagaccaagttactcat  
705 atatactttagattgatttaaaacttcatttttaatttaaaggatctaggtgaagatccttttgataatctcatgacaaaatccctta  
706 acgtgagtttctgtccactgagcgtcagaccccgtagaaaagatcaaaggatccttctgagatcctttttctgcgctgtaactgctg  
707 cttgcaaacaaaaaaccaccgctaccagcgggtggtttgttccggatcaagagctaccaactcctttccgaagtaactggcttc  
708 agcagagcgcagataccaataactgttcttctagtgtagccgtagttaggccaccacttcaagaactctgtagcaccgcctacatac  
709 ctgctctgtaactcctgttaccagtggtgctgcccagtgccgataagtcgtgtcttaccgggttgactcaagacgatagttaccgg  
710 ataaggcgcagcgggtcgggtgaacggggggttcgtgcacacagcccagcttggagcgaacgacctacaccgaactgagatacct  
711 acagcgtgagctatgagaaagcgcacgcttcccgaaggagaaaggcggacaggtatccgtaagcggcagggtcggaaacagg  
712 agagcgcacgaggagcttccagggggaacgcctggtatctttatagtcctgctgggttccacactgactgagcgtcattt  
713 ttgtgatgctcgtcagggggcgagcctatggaaaaacgcagcaacgcggccttttacggcttctggcctttgctggcctttgct  
714 tcacatggtaccattattagtttttttatcaccacaacgtataaacccctttcagaagaaaacagagaatgaaaacagatttta  
715 atttatatacgtatctataattagtttttttattgagttttagaagtgctttgtcctggagcgaatacacgatatcgtgtagtct  
716 cctcagatgaaaataatatttttaattttcagaatattactggaaaaatacctgaaaaatattgaaaaaaaacatacaccag  
717 cggggaaaaatcgaacattttgaaaaagtctattatagggtttaaacaggccaagacctgaggatatacccaaaaatggttcg  
718 ataaaaaatcgaacattttcgaacatttttataatgttcgatgtgtcagatgttcgataaaaaatcgaacattttgaaaga  
719 caattgagagatataaaaaaataatctattataatagatatataatgttcgatattttttatattatattat  
720 attaacctgtattgattattgaataatatttattactttttgatttctgtataaaaaatcgaacatattttacatattgtaaaaa  
721 taaaaaagatttaaaaaagtgccgaaaaagttaaacaaacattattataaaatgtagtttaaatatgtatcttgatgctcttct  
722 tctttcatgcttaaacctgtataactgtatgctttttcatttctttatgttcttcttcttcttcttcttcttcttcttcttctt  
723 cctgcatactcaaaaaatcgaagtttttaagttatcgagataagaattactagatgaattcgcggccttctagacgagataaga  
724 attactagataattcagctgatcgatcaaaaataacataaataacataggtttaaataatttaaaggcatattttatataaacaatt  
725 gtaaaatattggcttatgaaattgttaaaattagctaataagctattgatattataattttatagataactaataCTAGtagtggg  
726 aggtgcgctATGGAACATGTGGCCTTCGGATCAGAAGATATAGAGAACACTTTAGCCAAGATGGATGA  
727 TGGGCAATTAGACGGATTAGCGTTTGGGGCAATTCAGCTAGATGGGGATGGTAACATTCTTCAATA  
728 CAATGCTGCTGAAGGGGATATAACCGGGCAGATCCAAAACAGGTAATTGGAAAGAATTTTTCAA  
729 AGACGTCGCACCGGGTACAGATTCACCTGAATTTATGGTAAATTTAAAGAAGGTGTTGCAAGTGG  
730 AAATCTCAATACGATGTTTGAATGGATGATACCTACATCTAGAGGACCTACGAAAGTAAAAATCCAC  
731 ATGAAAAAGCTCTATCAGGTGACAGCTATTGGGTATTTGTTAAAAGAGTAGGAGGCGGGTCAGGA

732 GGAGGAGAACACGTCGCTTTTCGGTAGTGAAGATATAGAAAACACaTTAGCAAAGATGGACGACGG  
733 ACAGCTTGATGGGCTTGCATTTGGAGCAATCCAATTAGATGGAGATGGTAATATACTTCAATACAAT  
734 GCAGCAGAAAGGTGACATCACTGGTAGAGATCCCAAACAGGTCATTGGAAAAAATTTTTTAAAGAT  
735 GTTGCACCAGGAACAGATTCCCAGAAATTTACGGAAAATTTAAAGAAGGAGTAGCATCTGGAAATT  
736 TGAATACAATGTTTGAATGGATGATTCCAACtTCTAGAGGACCAACTAAAGTTAAGATTCACATGAA  
737 AAAAGCACTGTCCGGGAGATTCATATTGGGTTTTTGTAAAAGGGTTtaaaaattcttctctttaaacgttctcc  
738 agtctgcagataaaaaacgccctattcgaatatactattcaaaactaaatattcattgaaatattgggtaataattaatct  
739 aatatttagatattgagatataataaacatttttaaaaaatcatctatttcatcttaattttatatattaagccatttttgag  
740 attcaaattcaaattattgtttattaacatcttatataaaacttttctatttaattgtaataaaaaagtgaaatataatagag  
741 aatgttatgatgtatatatacaaaaaaactagaggagacgacctccatgacagaatataaaccaacagttagattagcaacaag  
742 agatgacgtacctagggcagtaagaactctgcagcagctttgcagattatccagcaacaagacacacagttgatccagatagac  
743 acattgaaagagttacagaattacaagaatttttaacaagagttggtcttgataggttaaagtaggggtgcagatgatggag  
744 cagcagttgcagtttgacaacaccagaatcagttgaagctggtgctgttttgcagaaattggaccaagaatggctgaattatcag  
745 gatcaagattagcagctcagcaacagatggaaggattactgcaccacacagacaaaagaaccagcatggttttagcaacagtt  
746 ggagtttcaccagatcaccagggaaaaggtttaggttctgctgttacttctggtggtgaagcagctgaaagagcaggagttcca  
747 gcatttttagaaacatcagcaccaagaatctccattttatgaaagacttggatttacagttacagcagatgttgaagtccagaag  
748 gaccaagaacatggtgtatgacaagaaaaccaggagcataacatggctccgaccgaagccaccggggcgcccccgcgacc  
749 cgcaccgccccgaggcccaccgccccggggacacaccgaacacgcccaccctgctgaacacgcccgcagttcggtgccagga  
750 gccgatcgggaattaattcgaagctgctggtgaaagagaccctatctacctgctaaaatctaagttaactactaatttattatta  
751 tattattagattgggtaaaatagtaaaagaaaactaaaggaaacctaatatggtttcttttttatatatttttaattcactgggggg  
752 atttaaaacttcatttttaatttaaaaggatctaggtgaagatccttgggtgactctcagtacaatctgctctgatgccgatagtaa  
753 gccagccccgacaccgccaacaccgctgacgcgcctgacgggcttctgctcccggcatccgcttacagacaagctgtgacc  
754 gtctccgggagctgcatgtgtcagaggtttaccgtcataccgaaacgcgagacgaaagggcctcgtgatacgcctattttat  
755 aggttaattgtcatgataataatggtttcttagacgtcaggtggcacttttcggggaatgtgcccgaacccctattgttttttct  
756 aaatacattcaaatatgtatccgctcatgagacaataaccctgataaatgcttcaataatattgaaaaggaagagatgagattc  
757 aacatttccgtgctgcccttattcccttttgcggcattttgccttctgcttttctcaccagaaacgctgggtaagtaaaagatgc  
758 tgaagatcagttgggtgcacgagtggttcatcgaactggatcacaacagcggaagatccttgagagtttcgccccgaagaacg  
759 tttccaatgatgagcacttttaagtctgctatgtggcgggtattatcccgtattgacgcccgggcaagagcaactcggctcggca  
760 tacactattctcagaatgacttggtgagtagtaccaggtcacagaaaagcatcttacggatggcatgacagtaagagaattatgca  
761 gtgctgcataaccatgagtgataaactgcccacttacttctgacaacgatcggaggaccgaaggagtaaccgctttttgc  
762 acaacatgggggatcatgtaactgccttgatcgttgggaaccggagctgaatgaagccataccaaacgacgagcgtgacacca
